# Supplementary material for: Specialized astrocytes mediate glutamatergic gliotransmission in the CNS
Source: Springer Nature journal article supplement (doi:10.1038/s41586-023-06502-w), 2023-09-06

---

**Supplementary information**

---

**Specialized astrocytes mediate  
glutamatergic gliotransmission in the CNS**

---

In the format provided by the  
authors and unedited

Supplementary Information

Gel full scans for **figure 3b** and **extended data figures 4c; 10b**.

Figure3

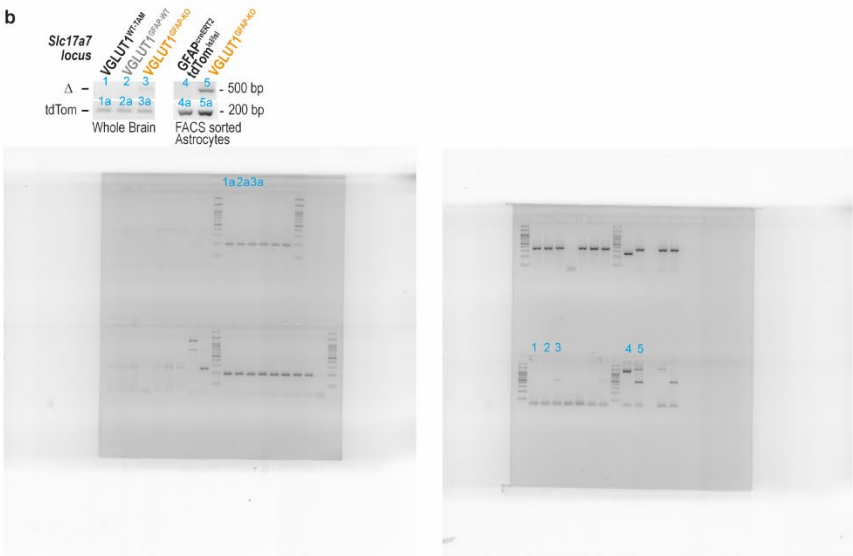

extended data 4

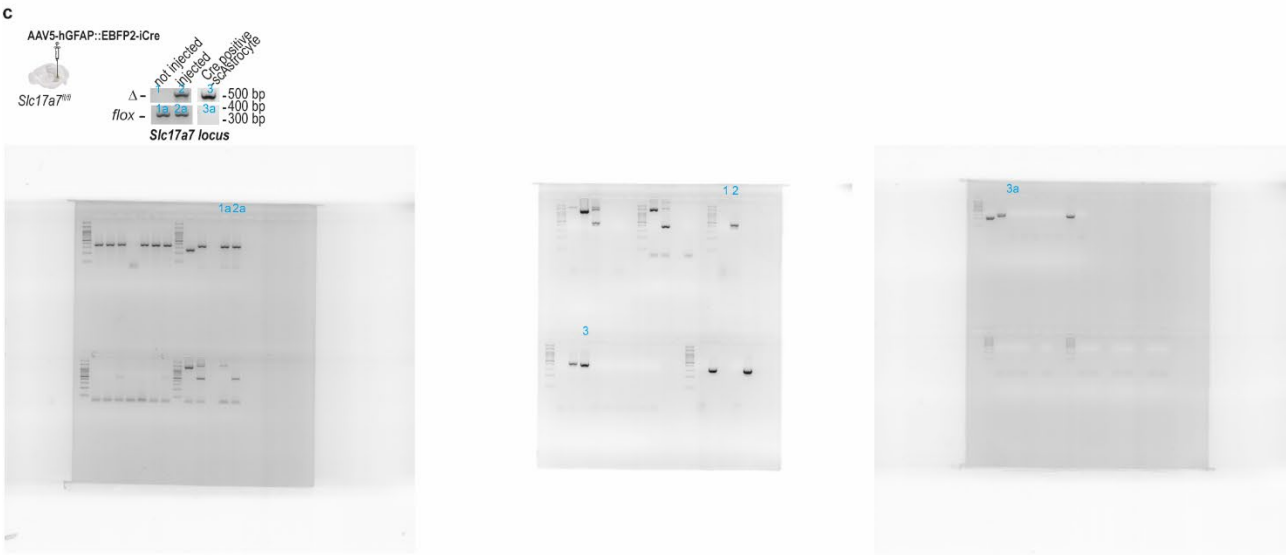

extended data 10

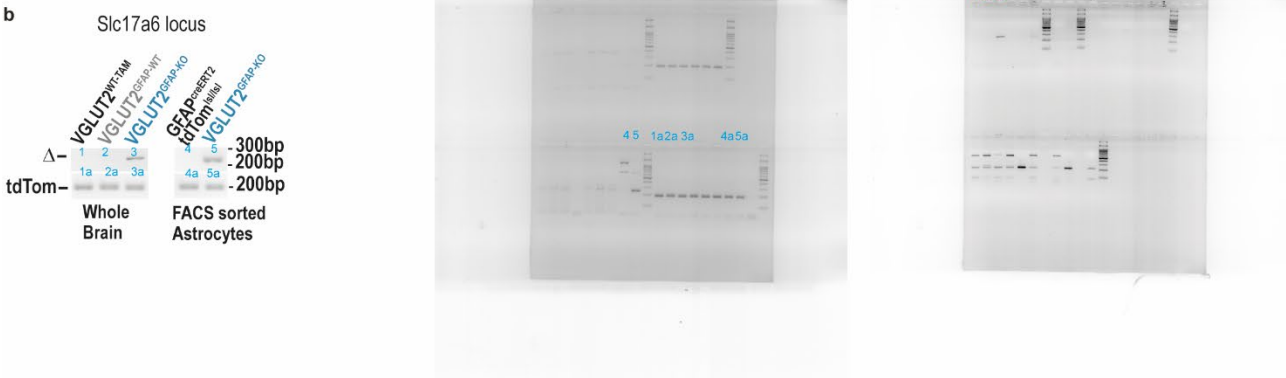

Supplement: MOESM1 [file 41586_2023_6502_MOESM1_ESM.pdf]
